# Supplementary material for: Complex formation of copper(ii), nickel(ii) and zinc(ii) with ethylophosphonoacetohydroxamic acid: solution speciation, synthesis and structural characterization
Source: Royal Society of Chemistry journal article supplement (doi:10.1039/c9nj01175g), 2019-01-01
Supplement: c9nj01175g1.pdf [file c9nj01175g1.pdf]

**Complex formation of copper(II), nickel(II) and zinc(II) with ethylphosphonoacetohydroxamic acid: solution speciation, synthesis and structural characterization**

Malgorzata Ostrowska,<sup>a</sup> Irina A. Golenya,<sup>b</sup> Matti Haukka,<sup>c</sup> Igor O. Fritsky,<sup>\*b</sup> Elzbieta Gumienna-Kontecka<sup>\*a</sup>

<sup>a</sup> Faculty of Chemistry, University of Wrocław, F. Joliot-Curie 14, 50-383 Wrocław, Poland. E-mail: elzbieta.gumienna-kontecka@chem.uni.wroc.pl

<sup>b</sup> Department of Chemistry, Taras Shevchenko National University of Kyiv, 64 Volodymyrska Str., 01601 Kiev, Ukraine

<sup>c</sup> Department of Chemistry, University of Jyväskylä, Seminaarinkatu 15 (C building), FI-40100 Jyväskylä, Finland

## **Supplementary Information**

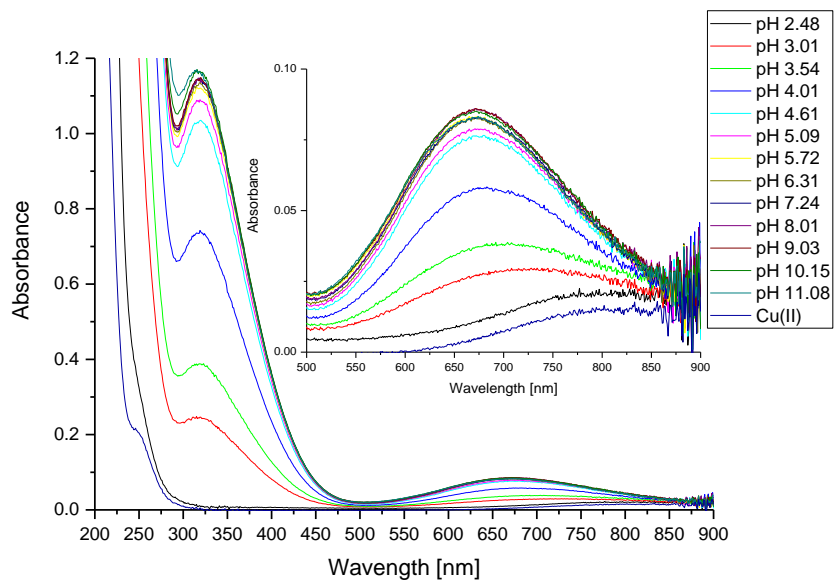

**Figure S1.** pH-dependent changes of UV-Vis spectra of Cu(II)/PAHEt system,  $[L] = 3.33 \cdot 10^{-3}$  M, metal-to-ligand ratio of 1:3,  $l = 1$  cm.

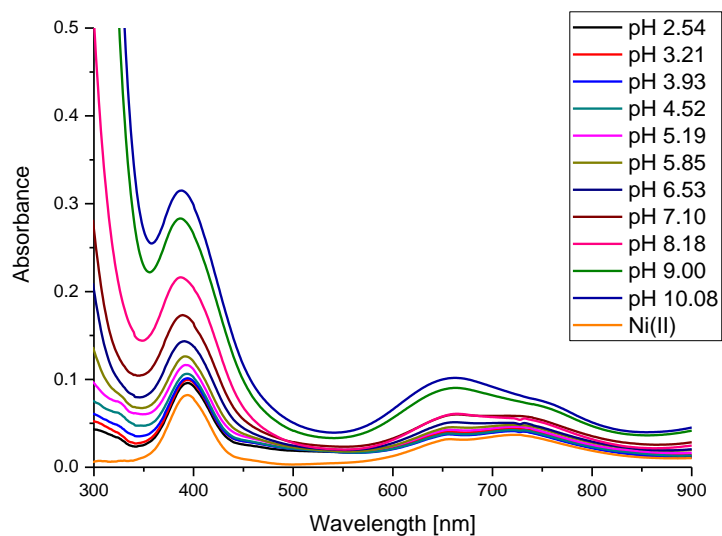

**Figure S2.** pH-dependent changes of UV-Vis spectra of Ni(II)/PAHEt system,  $[L] = 5.68 \cdot 10^{-3}$  M, metal-to-ligand ratio of 1:3,  $l = 5$  cm.

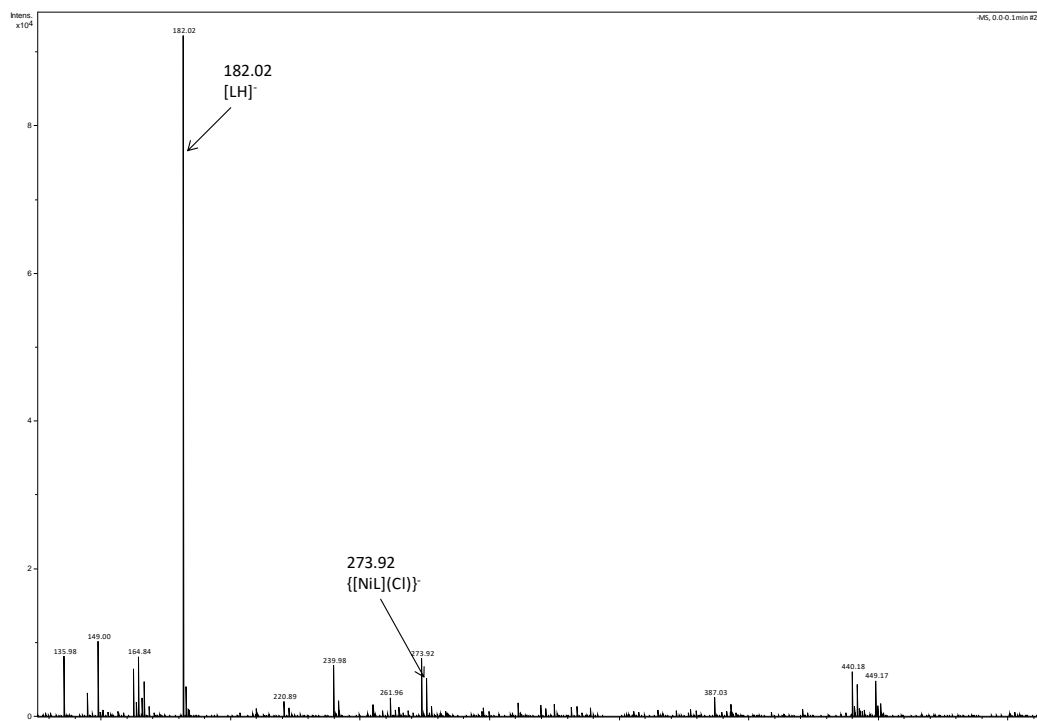

**Figure S3.** ESI-MS spectra of Ni(II)/PAHEt system, metal-to-ligand ratio of 1:1 at pH 8.

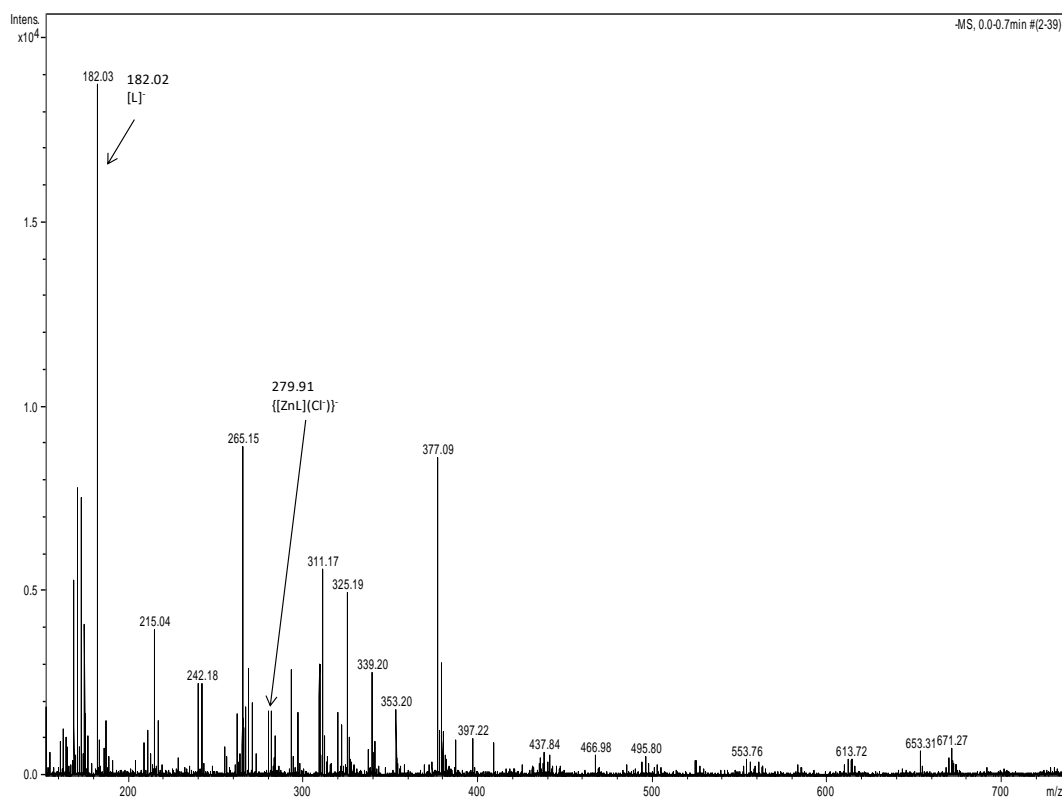

**Figure S4.** ESI-MS spectra of Zn(II)/PAHEt system, metal-to-ligand ratio of 1:1 at pH 8.

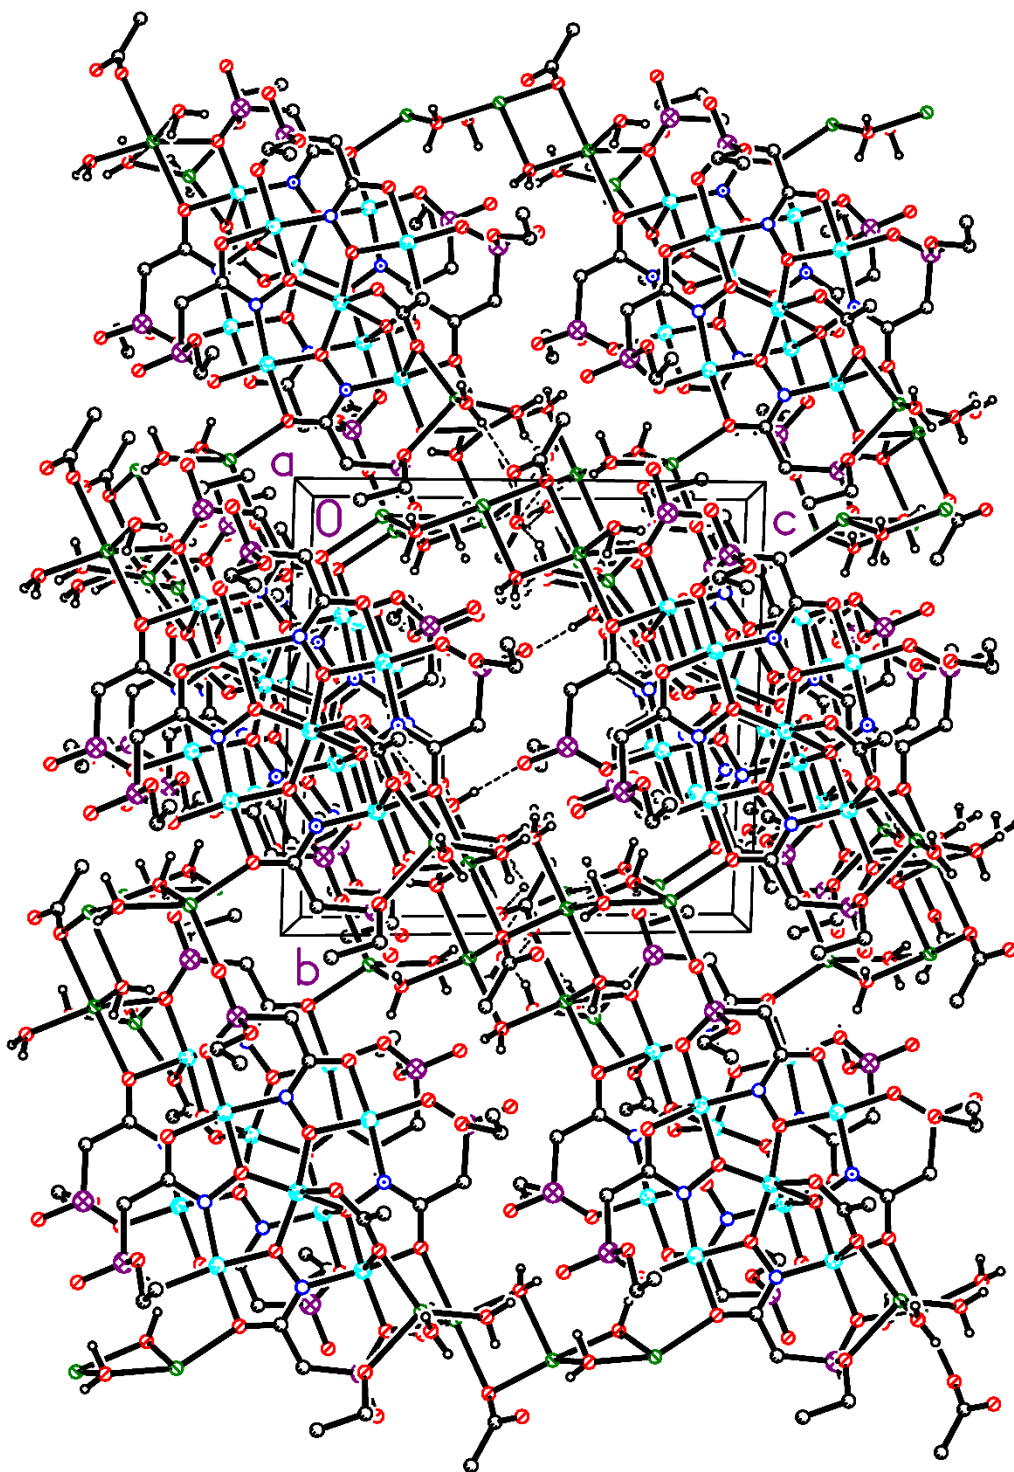

**Figure S5.** Packing diagram for **1** (a view along *a* direction of the crystal). Hydrogen atoms not involved into H-bonds and minor fractions of the disordered atoms are omitted for clarity. Colour scheme: turquoise = Cu, red = O, blue = N, black = C and H, purple = P, green = Na. H-bonds are represented by dashed lines.

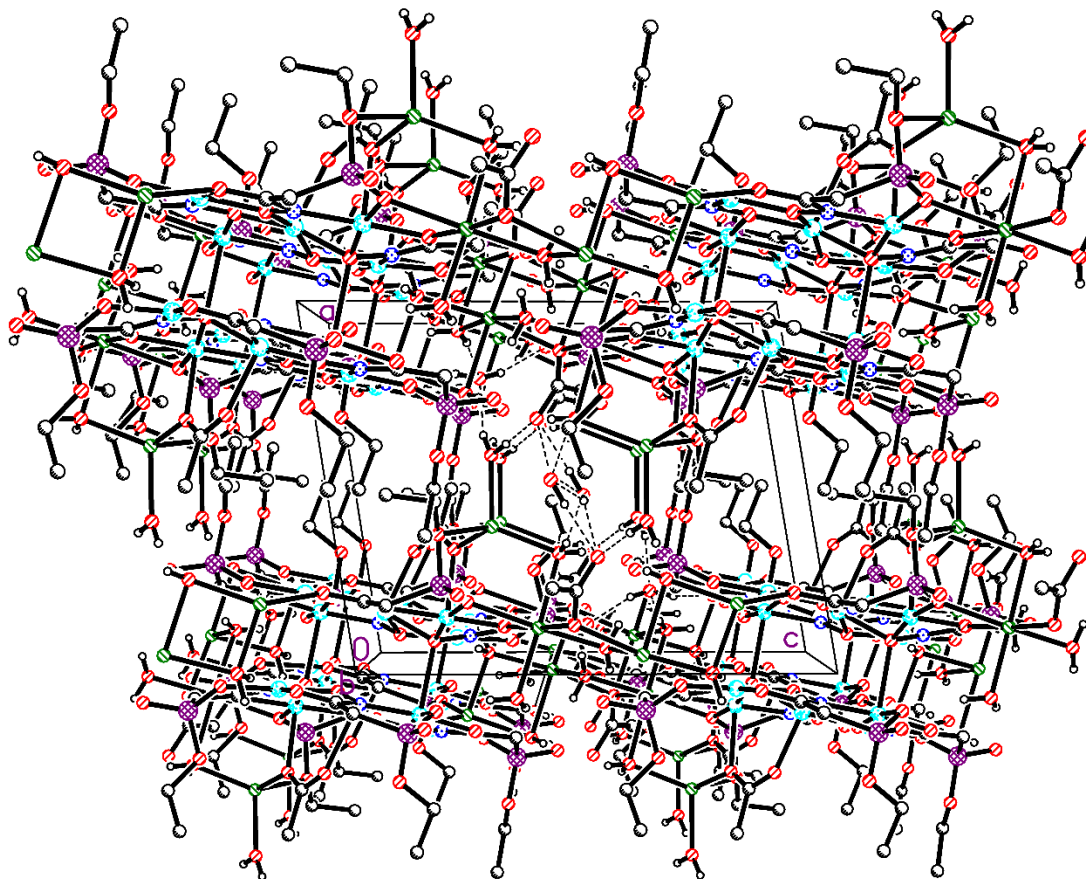

**Figure S6.** Packing diagram for **1** (a view along *b* direction of the crystal). Hydrogen atoms not involved into H-bonds and minor fractions of the disordered atoms are omitted for clarity. Colour scheme: turquoise = Cu, red = O, blue = N, black = C and H, purple = P, green = Na. H-bonds are represented by dashed lines.

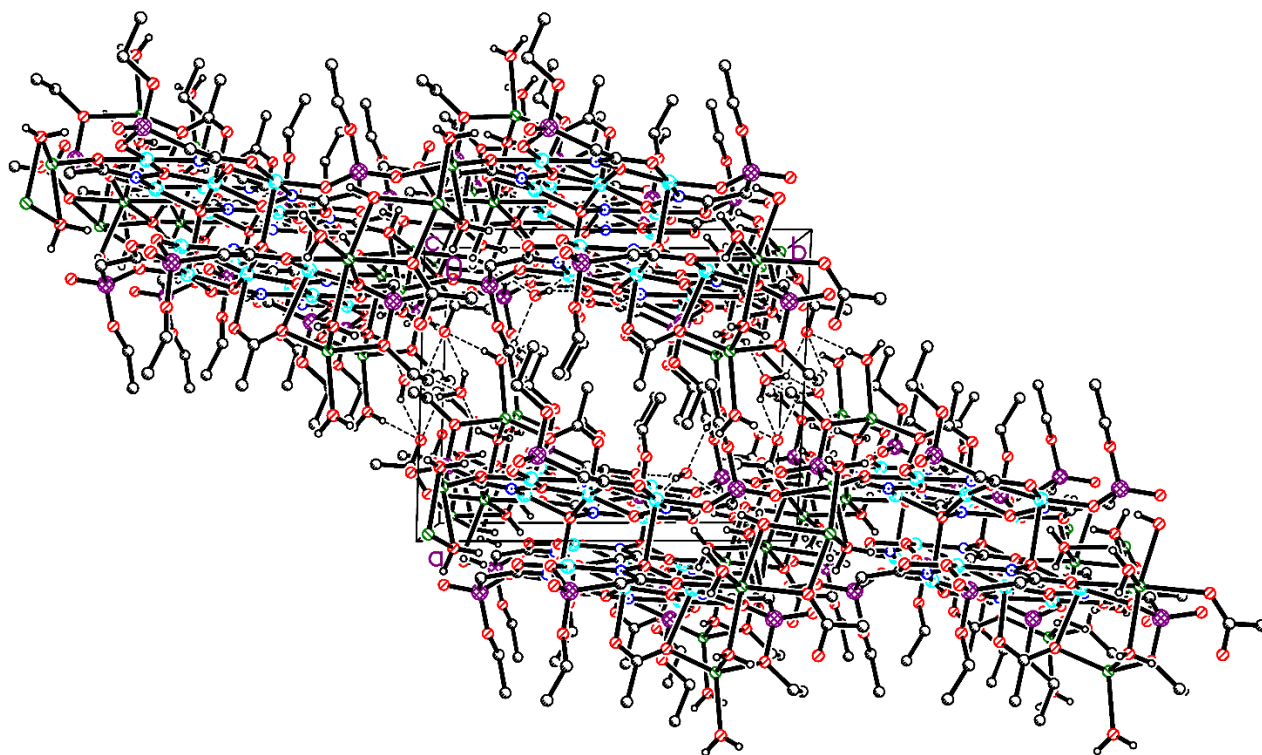

**Figure S7.** Packing diagram for **1** (a view along *c* direction of the crystal). Hydrogen atoms not involved into H-bonds and minor fractions of the disordered atoms are omitted for clarity. Colour scheme: turquoise = Cu, red = O, blue = N, black = C and H, purple = P, green = Na. H-bonds are represented by dashed lines.

**Table S1.** Crystal data and structure refinement parameters for the X-ray structure of **1**.*Crystal data*

|                                                                                                                              |                                                         |
|------------------------------------------------------------------------------------------------------------------------------|---------------------------------------------------------|
| <u>2(C<sub>20</sub>H<sub>46</sub>Cu<sub>5</sub>N<sub>4</sub>Na<sub>4</sub>O<sub>30</sub>P<sub>4</sub>)·3(H<sub>2</sub>O)</u> | $F(000) = 1396$                                         |
| $M_r = 2766.34$                                                                                                              |                                                         |
| Triclinic, <i>P</i> -1                                                                                                       | $D_x = 1.970 \text{Mg m}^{-3}$                          |
| Hallsymbol: ?                                                                                                                |                                                         |
| $a = 11.5160 (3) \text{ \AA}$                                                                                                | MoK $\alpha$ radiation, $\lambda = 0.71073 \text{ \AA}$ |
| $b = 13.9940 (3) \text{ \AA}$                                                                                                |                                                         |
| $c = 14.6740 (2) \text{ \AA}$                                                                                                | $\theta = 1.0\text{--}27.5^\circ$                       |
| $\alpha = 91.470 (1)^\circ$                                                                                                  | $\mu = 2.52 \text{mm}^{-1}$                             |
| $\beta = 99.155 (1)^\circ$                                                                                                   | $T = 100 \text{K}$                                      |
| $\gamma = 91.943 (1)^\circ$                                                                                                  | Needle, green                                           |
| $V = 2332.17 (9) \text{ \AA}^3$                                                                                              | $0.22 \times 0.10 \times 0.09 \text{mm}$                |
| $Z = 1$                                                                                                                      |                                                         |

*Data collection*

|                                                           |                                                                        |
|-----------------------------------------------------------|------------------------------------------------------------------------|
| NoniusKappaCCD diffractometer                             | 10669 independent reflections                                          |
| Radiation source: fine-focus sealed tube                  | 8022 reflections with $I > 2\sigma(I)$                                 |
| Horizontally mounted graphite crystal monochromator       | $R_{\text{int}} = 0.051$                                               |
| Detector resolution: 9 pixels $\text{mm}^{-1}$            | $\theta_{\text{max}} = 27.5^\circ$ , $\theta_{\text{min}} = 2.6^\circ$ |
| $\varphi$ scans and $\omega$ scans with $\kappa$ offset   | $h = -14 \text{ } 14$                                                  |
| Absorption correction: multi-scan SORTAV (Blessing, 1995) | $k = -18 \text{ } 18$                                                  |
| $T_{\text{min}} = 0.596$ , $T_{\text{max}} = 0.795$       | $l = -17 \text{ } 19$                                                  |
| 45451 measured reflections                                |                                                                        |

*Refinement*

|                                             |                                                                                     |
|---------------------------------------------|-------------------------------------------------------------------------------------|
| Refinement on $F^2$                         |                                                                                     |
| Least-squares matrix: <u>full</u>           | Hydrogen site location: <u>mixed</u>                                                |
| $R[F^2 > 2\sigma(F^2)] = \underline{0.041}$ | <u>H-atom parameters constrained</u>                                                |
| $wR(F^2) = \underline{0.109}$               | $w = 1/[\sigma^2(F_o^2) + (0.0475P)^2 + 5.3531P]$<br>where $P = (F_o^2 + 2F_c^2)/3$ |
| $S = \underline{1.02}$                      | $(\Delta/\sigma)_{\max} = \underline{0.001}$                                        |
| <u>10669</u> reflections                    | $\Delta\rho_{\max} = \underline{1.96} \text{ e } \text{\AA}^{-3}$                   |
| <u>648</u> parameters                       | $\Delta\rho_{\min} = \underline{-0.65} \text{ e } \text{\AA}^{-3}$                  |
| <u>6</u> restraints                         |                                                                                     |
|                                             |                                                                                     |
|                                             |                                                                                     |

**Table S4.** Bond lengths (Å) and angles (°) for **1**.

|                      |             |          |            |
|----------------------|-------------|----------|------------|
| Cu1—O2               | 1.901 (3)   | O9—C12   | 1.302 (4)  |
| Cu1—O21 <sup>i</sup> | 1.926 (3)   | O11—C8   | 1.296 (4)  |
| Cu1—O1               | 1.955 (3)   | O13—C3B  | 1.308 (18) |
| Cu1—N1               | 1.971 (3)   | O13—C3A  | 1.429 (7)  |
| Cu1—O6 <sup>ii</sup> | 2.439 (3)   | O16—C6   | 1.457 (6)  |
| Cu2—O3               | 1.864 (2)   | O18—H18O | 0.9498     |
| Cu2—O12              | 1.900 (3)   | O18—H18P | 0.9430     |
| Cu2—O11              | 1.947 (2)   | O19—H19O | 0.9735     |
| Cu2—N2               | 1.970 (3)   | O19—H19P | 0.7701     |
| Cu2—Na1              | 3.3549 (15) | O22—C16  | 1.425 (6)  |
| Cu3—O3               | 1.893 (2)   | O24—C10  | 1.451 (5)  |
| Cu3—O7               | 1.916 (3)   | O25—H25O | 0.8537     |
| Cu3—O2               | 1.926 (2)   | O25—H25P | 0.8473     |
| Cu3—O6               | 1.967 (2)   | O26—H26A | 0.8500     |
| Cu3—O4               | 2.187 (3)   | O26—H26B | 0.8500     |
| Cu4—O7               | 1.903 (2)   | O27—H27O | 0.9116     |



|         |             |           |           |
|---------|-------------|-----------|-----------|
| Cu4—O15 | 1.905 (2)   | O27—H27P  | 0.9138    |
| Cu4—O8  | 1.929 (3)   | O28—H28O  | 0.9031    |
| Cu4—N4  | 1.961 (3)   | O28—H28P  | 0.8226    |
| Cu5—O9  | 1.942 (2)   | O29—C19   | 1.248 (5) |
| Cu5—O6  | 1.949 (2)   | O30—C19   | 1.267 (5) |
| Cu5—N3  | 1.952 (3)   | O31—H31O  | 0.9530    |
| Cu5—O10 | 1.961 (3)   | O31—H31P  | 0.8146    |
| Cu5—O5  | 2.338 (3)   | O32A—H32A | 0.8500    |
| Cu5—Na3 | 3.2854 (19) | O32A—H32B | 0.8500    |
| Cu5—Na4 | 3.3120 (15) | O32B—H32C | 0.8499    |
| P1—O14  | 1.500 (3)   | O32B—H32D | 0.8499    |
| P1—O12  | 1.525 (3)   | N1—C5     | 1.300 (5) |
| P1—O13  | 1.575 (3)   | N2—C1     | 1.306 (5) |
| P1—C2   | 1.802 (4)   | N3—C8     | 1.299 (5) |
| P2—O17  | 1.496 (3)   | N4—C12    | 1.298 (5) |
| P2—O15  | 1.514 (3)   | C1—C2     | 1.509 (5) |
| P2—O16  | 1.584 (3)   | C2—H2A    | 0.9900    |
| P2—C13  | 1.812 (4)   | C2—H2B    | 0.9900    |
| P3—O23  | 1.481 (3)   | C3A—C4A   | 1.509 (8) |
| P3—O10  | 1.525 (3)   | C3A—H3A   | 0.9900    |
| P3—O24  | 1.595 (3)   | C3A—H3B   | 0.9900    |
| P3—C9   | 1.807 (4)   | C4A—H4A1  | 0.9800    |
| P3—Na3  | 3.208 (2)   | C4A—H4A2  | 0.9800    |
| P4—O20  | 1.485 (3)   | C4A—H4A3  | 0.9800    |
| P4—O21  | 1.524 (3)   | C3B—C4B   | 1.73 (2)  |
| P4—O22  | 1.590 (3)   | C3B—H3C   | 0.9900    |
| P4—C18  | 1.810 (4)   | C3B—H3D   | 0.9900    |
| Na1—O20 | 2.259 (3)   | C4B—H4B1  | 0.9800    |
| Na1—O11 | 2.296 (3)   | C4B—H4B2  | 0.9800    |

|                        |           |                     |           |
|------------------------|-----------|---------------------|-----------|
| Na1—O19                | 2.317 (3) | C4B—H4B3            | 0.9800    |
| Na1—O18                | 2.318 (3) | C5—C18 <sup>i</sup> | 1.501 (5) |
| Na1—O12                | 2.663 (3) | C6—C7               | 1.466 (7) |
| Na1—Na2                | 3.323 (2) | C6—H6A              | 0.9900    |
| Na2—O29 <sup>iii</sup> | 2.325 (3) | C6—H6B              | 0.9900    |
| Na2—O18                | 2.394 (3) | C7—H7A              | 0.9800    |
| Na2—O19                | 2.448 (3) | C7—H7B              | 0.9800    |
| Na2—O27 <sup>iv</sup>  | 2.450 (3) | C7—H7C              | 0.9800    |
| Na2—O29 <sup>iv</sup>  | 2.468 (3) | C8—C9               | 1.504 (5) |
| Na2—O28 <sup>iii</sup> | 2.484 (3) | C9—H9A              | 0.9900    |
| Na2—Na2 <sup>v</sup>   | 3.475 (3) | C9—H9B              | 0.9900    |
| Na2—Na4 <sup>iv</sup>  | 3.581 (2) | C10—C11             | 1.523 (7) |
| Na2—Na4 <sup>iii</sup> | 3.610 (2) | C10—H10A            | 0.9900    |
| Na2—H19P               | 2.5733    | C10—H10B            | 0.9900    |
| Na3—O5                 | 2.220 (4) | C11—H11A            | 0.9800    |
| Na3—O25                | 2.244 (4) | C11—H11B            | 0.9800    |
| Na3—O26                | 2.283 (4) | C11—H11C            | 0.9800    |
| Na3—O24                | 2.479 (3) | C12—C13             | 1.505 (5) |
| Na3—O10                | 2.646 (3) | C13—H13A            | 0.9900    |
| Na3—O32B               | 2.68 (2)  | C13—H13B            | 0.9900    |
| Na3—Na4                | 3.561 (2) | C14—C15             | 1.535 (7) |
| Na4—O27                | 2.350 (3) | C15—H15A            | 0.9800    |
| Na4—O10                | 2.369 (3) | C15—H15B            | 0.9800    |
| Na4—O28                | 2.399 (3) | C15—H15C            | 0.9800    |
| Na4—O26                | 2.448 (4) | C16—C17             | 1.497 (8) |
| Na4—O9                 | 2.474 (3) | C16—H16A            | 0.9900    |
| Na4—O29                | 2.495 (3) | C16—H16B            | 0.9900    |
| Na4—H28O               | 2.5217    | C17—H17A            | 0.9800    |
| O1—C1                  | 1.287 (4) | C17—H17B            | 0.9800    |

|                                        |             |                                           |             |
|----------------------------------------|-------------|-------------------------------------------|-------------|
| O2—N2                                  | 1.412 (4)   | C17—H17C                                  | 0.9800      |
| O3—N3                                  | 1.403 (4)   | C18—H18A                                  | 0.9900      |
| O4—C14                                 | 1.250 (6)   | C18—H18B                                  | 0.9900      |
| O5—C14                                 | 1.266 (5)   | C19—C20                                   | 1.497 (5)   |
| O6—N4                                  | 1.431 (4)   | C20—H20A                                  | 0.9800      |
| O7—N1                                  | 1.416 (4)   | C20—H20B                                  | 0.9800      |
| O8—C5                                  | 1.301 (4)   | C20—H20C                                  | 0.9800      |
| O2—Cu1—O21 <sup>i</sup>                | 170.84 (13) | O10—Na4—Na2 <sup>iii</sup>                | 101.73 (8)  |
| O2—Cu1—O1                              | 80.75 (10)  | O28—Na4—Na2 <sup>iii</sup>                | 43.24 (7)   |
| O21 <sup>i</sup> —Cu1—O1               | 95.23 (11)  | O26—Na4—Na2 <sup>iii</sup>                | 129.42 (12) |
| O2—Cu1—N1                              | 90.00 (11)  | O9—Na4—Na2 <sup>iii</sup>                 | 142.74 (9)  |
| O21 <sup>i</sup> —Cu1—N1               | 93.44 (12)  | O29—Na4—Na2 <sup>iii</sup>                | 39.73 (7)   |
| O1—Cu1—N1                              | 170.17 (12) | Cu5—Na4—Na2 <sup>iii</sup>                | 122.29 (5)  |
| O2—Cu1—O6 <sup>ii</sup>                | 98.46 (11)  | Na3—Na4—Na2 <sup>iii</sup>                | 133.93 (6)  |
| O21 <sup>i</sup> —Cu1—O6 <sup>ii</sup> | 89.92 (10)  | Na2 <sup>vi</sup> —Na4—Na2 <sup>iii</sup> | 57.79 (5)   |
| O1—Cu1—O6 <sup>ii</sup>                | 92.73 (10)  | O27—Na4—H28O                              | 82.5        |
| N1—Cu1—O6 <sup>ii</sup>                | 91.91 (11)  | O10—Na4—H28O                              | 100.4       |
| O3—Cu2—O12                             | 172.95 (11) | O28—Na4—H28O                              | 21.0        |
| O3—Cu2—O11                             | 81.62 (10)  | O26—Na4—H28O                              | 167.7       |
| O12—Cu2—O11                            | 91.38 (11)  | O9—Na4—H28O                               | 85.4        |
| O3—Cu2—N2                              | 89.90 (11)  | O29—Na4—H28O                              | 97.4        |
| O12—Cu2—N2                             | 97.11 (12)  | Cu5—Na4—H28O                              | 86.8        |
| O11—Cu2—N2                             | 171.40 (11) | Na3—Na4—H28O                              | 143.5       |
| O3—Cu2—Na1                             | 120.58 (8)  | Na2 <sup>vi</sup> —Na4—H28O               | 85.9        |
| O12—Cu2—Na1                            | 52.43 (8)   | Na2 <sup>iii</sup> —Na4—H28O              | 59.6        |
| O11—Cu2—Na1                            | 41.56 (7)   | C1—O1—Cu1                                 | 110.8 (2)   |
| N2—Cu2—Na1                             | 146.87 (9)  | N2—O2—Cu1                                 | 113.4 (2)   |
| O3—Cu3—O7                              | 164.08 (12) | N2—O2—Cu3                                 | 122.4 (2)   |
| O3—Cu3—O2                              | 87.70 (11)  | Cu1—O2—Cu3                                | 119.19 (13) |

|             |             |                          |             |
|-------------|-------------|--------------------------|-------------|
| O7—Cu3—O2   | 89.54 (10)  | N3—O3—Cu2                | 115.1 (2)   |
| O3—Cu3—O6   | 92.04 (10)  | N3—O3—Cu3                | 121.2 (2)   |
| O7—Cu3—O6   | 86.94 (10)  | Cu2—O3—Cu3               | 123.60 (13) |
| O2—Cu3—O6   | 166.18 (11) | C14—O4—Cu3               | 126.7 (3)   |
| O3—Cu3—O4   | 98.20 (13)  | C14—O5—Na3               | 137.4 (3)   |
| O7—Cu3—O4   | 97.71 (12)  | C14—O5—Cu5               | 130.1 (3)   |
| O2—Cu3—O4   | 97.55 (12)  | Na3—O5—Cu5               | 92.22 (12)  |
| O6—Cu3—O4   | 96.17 (12)  | N4—O6—Cu5                | 108.66 (18) |
| O7—Cu4—O15  | 173.60 (11) | N4—O6—Cu3                | 113.06 (19) |
| O7—Cu4—O8   | 81.16 (10)  | Cu5—O6—Cu3               | 107.84 (12) |
| O15—Cu4—O8  | 92.45 (11)  | N4—O6—Cu1 <sup>ii</sup>  | 109.94 (18) |
| O7—Cu4—N4   | 91.72 (11)  | Cu5—O6—Cu1 <sup>ii</sup> | 106.93 (11) |
| O15—Cu4—N4  | 94.68 (11)  | Cu3—O6—Cu1 <sup>ii</sup> | 110.18 (10) |
| O8—Cu4—N4   | 172.43 (11) | N1—O7—Cu4                | 112.66 (19) |
| O9—Cu5—O6   | 81.70 (10)  | N1—O7—Cu3                | 119.6 (2)   |
| O9—Cu5—N3   | 174.55 (12) | Cu4—O7—Cu3               | 114.59 (12) |
| O6—Cu5—N3   | 93.14 (11)  | C5—O8—Cu4                | 111.1 (2)   |
| O9—Cu5—O10  | 91.11 (11)  | C12—O9—Cu5               | 108.9 (2)   |
| O6—Cu5—O10  | 169.18 (11) | C12—O9—Na4               | 154.6 (2)   |
| N3—Cu5—O10  | 94.24 (12)  | Cu5—O9—Na4               | 96.42 (10)  |
| O9—Cu5—O5   | 86.47 (11)  | P3—O10—Cu5               | 127.92 (16) |
| O6—Cu5—O5   | 92.70 (11)  | P3—O10—Na4               | 132.00 (15) |
| N3—Cu5—O5   | 92.05 (12)  | Cu5—O10—Na4              | 99.38 (11)  |
| O10—Cu5—O5  | 94.93 (12)  | P3—O10—Na3               | 96.84 (14)  |
| O9—Cu5—Na3  | 79.39 (8)   | Cu5—O10—Na3              | 89.71 (11)  |
| O6—Cu5—Na3  | 131.83 (8)  | Na4—O10—Na3              | 90.31 (10)  |
| N3—Cu5—Na3  | 103.01 (10) | C8—O11—Cu2               | 110.5 (2)   |
| O10—Cu5—Na3 | 53.65 (9)   | C8—O11—Na1               | 139.6 (2)   |
| O5—Cu5—Na3  | 42.46 (8)   | Cu2—O11—Na1              | 104.21 (11) |

|             |             |                           |             |
|-------------|-------------|---------------------------|-------------|
| O9—Cu5—Na4  | 47.94 (8)   | P1—O12—Cu2                | 123.96 (16) |
| O6—Cu5—Na4  | 125.86 (8)  | P1—O12—Na1                | 142.59 (15) |
| N3—Cu5—Na4  | 137.50 (9)  | Cu2—O12—Na1               | 93.14 (10)  |
| O10—Cu5—Na4 | 44.89 (8)   | C3B—O13—P1                | 131.8 (9)   |
| O5—Cu5—Na4  | 101.16 (8)  | C3A—O13—P1                | 120.2 (3)   |
| Na3—Cu5—Na4 | 65.33 (4)   | P2—O15—Cu4                | 121.63 (15) |
| O14—P1—O12  | 112.33 (15) | C6—O16—P2                 | 119.9 (3)   |
| O14—P1—O13  | 110.70 (17) | Na1—O18—Na2               | 89.67 (11)  |
| O12—P1—O13  | 110.06 (16) | Na1—O18—H18O              | 103.5       |
| O14—P1—C2   | 109.72 (17) | Na2—O18—H18O              | 131.7       |
| O12—P1—C2   | 110.97 (17) | Na1—O18—H18P              | 130.9       |
| O13—P1—C2   | 102.64 (17) | Na2—O18—H18P              | 110.0       |
| O17—P2—O15  | 114.91 (15) | H18O—O18—H18P             | 95.9        |
| O17—P2—O16  | 110.95 (16) | Na1—O19—Na2               | 88.40 (10)  |
| O15—P2—O16  | 106.12 (16) | Na1—O19—H19O              | 115.6       |
| O17—P2—C13  | 109.20 (16) | Na2—O19—H19O              | 98.2        |
| O15—P2—C13  | 109.13 (16) | Na1—O19—H19P              | 148.9       |
| O16—P2—C13  | 106.14 (18) | Na2—O19—H19P              | 90.6        |
| O23—P3—O10  | 117.45 (16) | H19O—O19—H19P             | 95.3        |
| O23—P3—O24  | 111.73 (16) | P4—O20—Na1                | 162.3 (2)   |
| O10—P3—O24  | 103.11 (15) | P4—O21—Cu1 <sup>vii</sup> | 118.67 (15) |
| O23—P3—C9   | 108.50 (17) | C16—O22—P4                | 121.8 (3)   |
| O10—P3—C9   | 109.33 (17) | C10—O24—P3                | 122.5 (3)   |
| O24—P3—C9   | 106.10 (17) | C10—O24—Na3               | 121.2 (3)   |
| O23—P3—Na3  | 122.95 (12) | P3—O24—Na3                | 101.67 (14) |
| O10—P3—Na3  | 54.99 (12)  | Na3—O25—H25O              | 133.2       |
| O24—P3—Na3  | 49.18 (11)  | Na3—O25—H25P              | 116.8       |
| C9—P3—Na3   | 127.86 (13) | H25O—O25—H25P             | 108.6       |
| O20—P4—O21  | 113.23 (16) | Na3—O26—Na4               | 97.60 (13)  |

|                             |             |                                           |            |
|-----------------------------|-------------|-------------------------------------------|------------|
| O20—P4—O22                  | 112.61 (19) | Na3—O26—H26A                              | 112.4      |
| O21—P4—O22                  | 109.23 (17) | Na4—O26—H26A                              | 112.4      |
| O20—P4—C18                  | 110.63 (17) | Na3—O26—H26B                              | 112.0      |
| O21—P4—C18                  | 110.78 (17) | Na4—O26—H26B                              | 112.1      |
| O22—P4—C18                  | 99.55 (17)  | H26A—O26—H26B                             | 109.8      |
| O20—Na1—O11                 | 101.27 (11) | Na4—O27—Na2 <sup>vi</sup>                 | 96.46 (10) |
| O20—Na1—O19                 | 116.45 (12) | Na4—O27—H27O                              | 123.2      |
| O11—Na1—O19                 | 136.27 (12) | Na2 <sup>vi</sup> —O27—H27O               | 117.5      |
| O20—Na1—O18                 | 98.56 (12)  | Na4—O27—H27P                              | 108.4      |
| O11—Na1—O18                 | 105.96 (11) | Na2 <sup>vi</sup> —O27—H27P               | 103.6      |
| O19—Na1—O18                 | 90.18 (11)  | H27O—O27—H27P                             | 105.9      |
| O20—Na1—O12                 | 167.88 (11) | Na4—O28—Na2 <sup>iii</sup>                | 95.32 (10) |
| O11—Na1—O12                 | 66.95 (9)   | Na4—O28—H28O                              | 87.2       |
| O19—Na1—O12                 | 73.53 (9)   | Na2 <sup>iii</sup> —O28—H28O              | 135.5      |
| O18—Na1—O12                 | 87.89 (10)  | Na4—O28—H28P                              | 107.7      |
| O20—Na1—Na2                 | 101.10 (9)  | Na2 <sup>iii</sup> —O28—H28P              | 119.4      |
| O11—Na1—Na2                 | 146.59 (9)  | H28O—O28—H28P                             | 101.6      |
| O19—Na1—Na2                 | 47.42 (8)   | C19—O29—Na2 <sup>iii</sup>                | 124.6 (3)  |
| O18—Na1—Na2                 | 46.09 (7)   | C19—O29—Na2 <sup>vi</sup>                 | 118.1 (2)  |
| O12—Na1—Na2                 | 90.77 (7)   | Na2 <sup>iii</sup> —O29—Na2 <sup>vi</sup> | 92.88 (10) |
| O20—Na1—Cu2                 | 134.60 (9)  | C19—O29—Na4                               | 123.7 (3)  |
| O11—Na1—Cu2                 | 34.22 (7)   | Na2 <sup>iii</sup> —O29—Na4               | 96.96 (10) |
| O19—Na1—Cu2                 | 107.85 (8)  | Na2 <sup>vi</sup> —O29—Na4                | 92.35 (10) |
| O18—Na1—Cu2                 | 90.49 (8)   | H31O—O31—H31P                             | 107.9      |
| O12—Na1—Cu2                 | 34.43 (6)   | H32A—O32A—H32B                            | 109.7      |
| Na2—Na1—Cu2                 | 116.36 (5)  | Na3—O32B—H32C                             | 116.3      |
| O29 <sup>iii</sup> —Na2—O18 | 100.37 (11) | Na3—O32B—H32D                             | 105.4      |
| O29 <sup>iii</sup> —Na2—O19 | 167.68 (11) | H32C—O32B—H32D                            | 111.4      |
| O18—Na2—O19                 | 85.35 (10)  | C5—N1—O7                                  | 110.7 (3)  |

|                                            |             |               |           |
|--------------------------------------------|-------------|---------------|-----------|
| O29 <sup>iii</sup> —Na2—O27 <sup>iv</sup>  | 102.46 (11) | C5—N1—Cu1     | 135.4 (3) |
| O18—Na2—O27 <sup>iv</sup>                  | 96.60 (10)  | O7—N1—Cu1     | 113.6 (2) |
| O19—Na2—O27 <sup>iv</sup>                  | 87.56 (10)  | C1—N2—O2      | 110.5 (3) |
| O29 <sup>iii</sup> —Na2—O29 <sup>iv</sup>  | 87.12 (10)  | C1—N2—Cu2     | 133.8 (3) |
| O18—Na2—O29 <sup>iv</sup>                  | 171.95 (11) | O2—N2—Cu2     | 115.6 (2) |
| O19—Na2—O29 <sup>iv</sup>                  | 86.73 (10)  | C8—N3—O3      | 110.4 (3) |
| O27 <sup>iv</sup> —Na2—O29 <sup>iv</sup>   | 84.52 (10)  | C8—N3—Cu5     | 136.0 (3) |
| O29 <sup>iii</sup> —Na2—O28 <sup>iii</sup> | 84.70 (10)  | O3—N3—Cu5     | 113.3 (2) |
| O18—Na2—O28 <sup>iii</sup>                 | 87.37 (10)  | C12—N4—O6     | 111.8 (3) |
| O19—Na2—O28 <sup>iii</sup>                 | 84.68 (10)  | C12—N4—Cu4    | 134.6 (3) |
| O27 <sup>iv</sup> —Na2—O28 <sup>iii</sup>  | 170.97 (11) | O6—N4—Cu4     | 113.5 (2) |
| O29 <sup>iv</sup> —Na2—O28 <sup>iii</sup>  | 90.43 (10)  | O1—C1—N2      | 122.2 (3) |
| O29 <sup>iii</sup> —Na2—Na1                | 136.54 (9)  | O1—C1—C2      | 117.7 (3) |
| O18—Na2—Na1                                | 44.24 (8)   | N2—C1—C2      | 120.1 (3) |
| O19—Na2—Na1                                | 44.18 (7)   | C1—C2—P1      | 119.3 (3) |
| O27 <sup>iv</sup> —Na2—Na1                 | 105.56 (8)  | C1—C2—H2A     | 107.5     |
| O29 <sup>iv</sup> —Na2—Na1                 | 127.78 (9)  | P1—C2—H2A     | 107.5     |
| O28 <sup>iii</sup> —Na2—Na1                | 71.76 (7)   | C1—C2—H2B     | 107.5     |
| O29 <sup>iii</sup> —Na2—Na2 <sup>v</sup>   | 45.20 (7)   | P1—C2—H2B     | 107.5     |
| O18—Na2—Na2 <sup>v</sup>                   | 145.47 (11) | H2A—C2—H2B    | 107.0     |
| O19—Na2—Na2 <sup>v</sup>                   | 127.82 (10) | O13—C3A—C4A   | 109.2 (5) |
| O27 <sup>iv</sup> —Na2—Na2 <sup>v</sup>    | 94.39 (8)   | O13—C3A—H3A   | 109.8     |
| O29 <sup>iv</sup> —Na2—Na2 <sup>v</sup>    | 41.93 (7)   | C4A—C3A—H3A   | 109.8     |
| O28 <sup>iii</sup> —Na2—Na2 <sup>v</sup>   | 86.77 (8)   | O13—C3A—H3B   | 109.8     |
| Na1—Na2—Na2 <sup>v</sup>                   | 157.05 (8)  | C4A—C3A—H3B   | 109.8     |
| O29 <sup>iii</sup> —Na2—Na4 <sup>iv</sup>  | 92.86 (8)   | H3A—C3A—H3B   | 108.3     |
| O18—Na2—Na4 <sup>iv</sup>                  | 137.28 (9)  | C3A—C4A—H4A1  | 109.5     |
| O19—Na2—Na4 <sup>iv</sup>                  | 90.14 (8)   | C3A—C4A—H4A2  | 109.5     |
| O27 <sup>iv</sup> —Na2—Na4 <sup>iv</sup>   | 40.71 (7)   | H4A1—C4A—H4A2 | 109.5     |

|                                                         |             |                        |            |
|---------------------------------------------------------|-------------|------------------------|------------|
| O29 <sup>iv</sup> —Na <sub>2</sub> —Na4 <sup>iv</sup>   | 44.11 (7)   | C3A—C4A—H4A3           | 109.5      |
| O28 <sup>iii</sup> —Na <sub>2</sub> —Na4 <sup>iv</sup>  | 134.52 (8)  | H4A1—C4A—H4A3          | 109.5      |
| Na1—Na <sub>2</sub> —Na4 <sup>iv</sup>                  | 129.70 (6)  | H4A2—C4A—H4A3          | 109.5      |
| Na2 <sup>v</sup> —Na <sub>2</sub> —Na4 <sup>iv</sup>    | 61.53 (5)   | O13—C3B—C4B            | 103.0 (12) |
| O29 <sup>iii</sup> —Na <sub>2</sub> —Na4 <sup>iii</sup> | 43.31 (7)   | O13—C3B—H3C            | 111.2      |
| O18—Na <sub>2</sub> —Na4 <sup>iii</sup>                 | 93.68 (8)   | C4B—C3B—H3C            | 111.2      |
| O19—Na <sub>2</sub> —Na4 <sup>iii</sup>                 | 125.99 (8)  | O13—C3B—H3D            | 111.2      |
| O27 <sup>iv</sup> —Na <sub>2</sub> —Na4 <sup>iii</sup>  | 145.64 (9)  | C4B—C3B—H3D            | 111.2      |
| O29 <sup>iv</sup> —Na <sub>2</sub> —Na4 <sup>iii</sup>  | 89.77 (8)   | H3C—C3B—H3D            | 109.1      |
| O28 <sup>iii</sup> —Na <sub>2</sub> —Na4 <sup>iii</sup> | 41.43 (7)   | C3B—C4B—H4B1           | 109.5      |
| Na1—Na <sub>2</sub> —Na4 <sup>iii</sup>                 | 104.64 (5)  | C3B—C4B—H4B2           | 109.5      |
| Na2 <sup>v</sup> —Na <sub>2</sub> —Na4 <sup>iii</sup>   | 60.68 (5)   | H4B1—C4B—H4B2          | 109.5      |
| Na4 <sup>iv</sup> —Na <sub>2</sub> —Na4 <sup>iii</sup>  | 122.21 (5)  | C3B—C4B—H4B3           | 109.5      |
| O29 <sup>iii</sup> —Na <sub>2</sub> —H19P               | 152.9       | H4B1—C4B—H4B3          | 109.5      |
| O18—Na <sub>2</sub> —H19P                               | 102.4       | H4B2—C4B—H4B3          | 109.5      |
| O19—Na <sub>2</sub> —H19P                               | 17.4        | N1—C5—O8               | 121.6 (3)  |
| O27 <sup>iv</sup> —Na <sub>2</sub> —H19P                | 89.4        | N1—C5—C18 <sup>i</sup> | 121.1 (3)  |
| O29 <sup>iv</sup> —Na <sub>2</sub> —H19P                | 69.7        | O8—C5—C18 <sup>i</sup> | 117.3 (3)  |
| O28 <sup>iii</sup> —Na <sub>2</sub> —H19P               | 81.9        | O16—C6—C7              | 110.2 (4)  |
| Na1—Na <sub>2</sub> —H19P                               | 59.6        | O16—C6—H6A             | 109.6      |
| Na2 <sup>v</sup> —Na <sub>2</sub> —H19P                 | 110.4       | C7—C6—H6A              | 109.6      |
| Na4 <sup>iv</sup> —Na <sub>2</sub> —H19P                | 80.3        | O16—C6—H6B             | 109.6      |
| Na4 <sup>iii</sup> —Na <sub>2</sub> —H19P               | 120.2       | C7—C6—H6B              | 109.6      |
| O5—Na <sub>3</sub> —O25                                 | 112.75 (14) | H6A—C6—H6B             | 108.1      |
| O5—Na <sub>3</sub> —O26                                 | 120.16 (16) | C6—C7—H7A              | 109.5      |
| O25—Na <sub>3</sub> —O26                                | 110.65 (15) | C6—C7—H7B              | 109.5      |
| O5—Na <sub>3</sub> —O24                                 | 100.55 (12) | H7A—C7—H7B             | 109.5      |
| O25—Na <sub>3</sub> —O24                                | 91.29 (14)  | C6—C7—H7C              | 109.5      |
| O26—Na <sub>3</sub> —O24                                | 117.60 (15) | H7A—C7—H7C             | 109.5      |



|              |             |               |           |
|--------------|-------------|---------------|-----------|
| O5—Na3—O10   | 81.03 (11)  | H7B—C7—H7C    | 109.5     |
| O25—Na3—O10  | 147.77 (14) | O11—C8—N3     | 122.3 (3) |
| O26—Na3—O10  | 83.55 (12)  | O11—C8—C9     | 119.1 (3) |
| O24—Na3—O10  | 56.87 (9)   | N3—C8—C9      | 118.5 (3) |
| O5—Na3—O32B  | 174.9 (4)   | C8—C9—P3      | 117.8 (3) |
| O25—Na3—O32B | 72.1 (4)    | C8—C9—H9A     | 107.9     |
| O26—Na3—O32B | 55.4 (4)    | P3—C9—H9A     | 107.9     |
| O24—Na3—O32B | 80.5 (5)    | C8—C9—H9B     | 107.9     |
| O10—Na3—O32B | 95.5 (5)    | P3—C9—H9B     | 107.9     |
| O5—Na3—P3    | 94.23 (10)  | H9A—C9—H9B    | 107.2     |
| O25—Na3—P3   | 119.61 (12) | O24—C10—C11   | 111.2 (4) |
| O26—Na3—P3   | 98.24 (11)  | O24—C10—H10A  | 109.4     |
| O24—Na3—P3   | 29.15 (7)   | C11—C10—H10A  | 109.4     |
| O10—Na3—P3   | 28.17 (6)   | O24—C10—H10B  | 109.4     |
| O32B—Na3—P3  | 84.3 (5)    | C11—C10—H10B  | 109.4     |
| O5—Na3—Cu5   | 45.32 (9)   | H10A—C10—H10B | 108.0     |
| O25—Na3—Cu5  | 152.16 (12) | C10—C11—H11A  | 109.5     |
| O26—Na3—Cu5  | 96.86 (11)  | C10—C11—H11B  | 109.5     |
| O24—Na3—Cu5  | 79.21 (8)   | H11A—C11—H11B | 109.5     |
| O10—Na3—Cu5  | 36.64 (6)   | C10—C11—H11C  | 109.5     |
| O32B—Na3—Cu5 | 130.6 (4)   | H11A—C11—H11C | 109.5     |
| P3—Na3—Cu5   | 57.78 (4)   | H11B—C11—H11C | 109.5     |
| O5—Na3—Na4   | 96.63 (10)  | N4—C12—O9     | 122.7 (3) |
| O25—Na3—Na4  | 149.50 (12) | N4—C12—C13    | 120.5 (3) |
| O26—Na3—Na4  | 42.95 (9)   | O9—C12—C13    | 116.7 (3) |
| O24—Na3—Na4  | 91.22 (9)   | C12—C13—P2    | 119.4 (3) |
| O10—Na3—Na4  | 41.70 (6)   | C12—C13—H13A  | 107.5     |
| O32B—Na3—Na4 | 78.3 (4)    | P2—C13—H13A   | 107.5     |
| P3—Na3—Na4   | 63.49 (4)   | C12—C13—H13B  | 107.5     |

|             |             |                             |           |
|-------------|-------------|-----------------------------|-----------|
| Cu5—Na3—Na4 | 57.70 (4)   | P2—C13—H13B                 | 107.5     |
| O27—Na4—O10 | 164.64 (12) | H13A—C13—H13B               | 107.0     |
| O27—Na4—O28 | 96.48 (11)  | O4—C14—O5                   | 126.0 (4) |
| O10—Na4—O28 | 90.75 (11)  | O4—C14—C15                  | 117.4 (4) |
| O27—Na4—O26 | 88.39 (11)  | O5—C14—C15                  | 116.5 (4) |
| O10—Na4—O26 | 86.31 (11)  | C14—C15—H15A                | 109.5     |
| O28—Na4—O26 | 171.19 (14) | C14—C15—H15B                | 109.5     |
| O27—Na4—O9  | 95.16 (10)  | H15A—C15—H15B               | 109.5     |
| O10—Na4—O9  | 70.20 (9)   | C14—C15—H15C                | 109.5     |
| O28—Na4—O9  | 99.61 (10)  | H15A—C15—H15C               | 109.5     |
| O26—Na4—O9  | 87.21 (13)  | H15B—C15—H15C               | 109.5     |
| O27—Na4—O29 | 86.04 (10)  | O22—C16—C17                 | 110.1 (4) |
| O10—Na4—O29 | 108.36 (10) | O22—C16—H16A                | 109.6     |
| O28—Na4—O29 | 82.94 (10)  | C17—C16—H16A                | 109.6     |
| O26—Na4—O29 | 90.10 (13)  | O22—C16—H16B                | 109.6     |
| O9—Na4—O29  | 177.02 (11) | C17—C16—H16B                | 109.6     |
| O27—Na4—Cu5 | 130.46 (9)  | H16A—C16—H16B               | 108.2     |
| O10—Na4—Cu5 | 35.74 (7)   | C16—C17—H17A                | 109.5     |
| O28—Na4—Cu5 | 89.46 (8)   | C16—C17—H17B                | 109.5     |
| O26—Na4—Cu5 | 92.96 (10)  | H17A—C17—H17B               | 109.5     |
| O9—Na4—Cu5  | 35.64 (6)   | C16—C17—H17C                | 109.5     |
| O29—Na4—Cu5 | 143.41 (8)  | H17A—C17—H17C               | 109.5     |
| O27—Na4—Na3 | 123.06 (9)  | H17B—C17—H17C               | 109.5     |
| O10—Na4—Na3 | 47.99 (8)   | C5 <sup>vii</sup> —C18—P4   | 118.8 (3) |
| O28—Na4—Na3 | 138.69 (9)  | C5 <sup>vii</sup> —C18—H18A | 107.6     |
| O26—Na4—Na3 | 39.45 (9)   | P4—C18—H18A                 | 107.6     |
| O9—Na4—Na3  | 68.05 (8)   | C5 <sup>vii</sup> —C18—H18B | 107.6     |
| O29—Na4—Na3 | 109.02 (8)  | P4—C18—H18B                 | 107.6     |
| Cu5—Na4—Na3 | 56.97 (4)   | H18A—C18—H18B               | 107.1     |

|                            |              |                              |              |
|----------------------------|--------------|------------------------------|--------------|
| O27—Na4—Na2 <sup>vi</sup>  | 42.83 (7)    | O29—C19—O30                  | 123.0 (4)    |
| O10—Na4—Na2 <sup>vi</sup>  | 151.88 (9)   | O29—C19—C20                  | 120.9 (4)    |
| O28—Na4—Na2 <sup>vi</sup>  | 85.63 (8)    | O30—C19—C20                  | 116.1 (4)    |
| O26—Na4—Na2 <sup>vi</sup>  | 93.05 (10)   | C19—C20—H20A                 | 109.5        |
| O9—Na4—Na2 <sup>vi</sup>   | 137.89 (8)   | C19—C20—H20B                 | 109.5        |
| O29—Na4—Na2 <sup>vi</sup>  | 43.53 (7)    | H20A—C20—H20B                | 109.5        |
| Cu5—Na4—Na2 <sup>vi</sup>  | 170.79 (6)   | C19—C20—H20C                 | 109.5        |
| Na3—Na4—Na2 <sup>vi</sup>  | 130.66 (6)   | H20A—C20—H20C                | 109.5        |
| O27—Na4—Na2 <sup>iii</sup> | 92.77 (8)    | H20B—C20—H20C                | 109.5        |
| O11—Cu2—O3—N3              | 2.0 (2)      | Cu2—O3—N3—Cu5                | -177.40 (14) |
| N2—Cu2—O3—N3               | -179.4 (2)   | Cu3—O3—N3—Cu5                | 5.5 (3)      |
| Na1—Cu2—O3—N3              | -13.0 (3)    | Cu5—O6—N4—C12                | 19.6 (3)     |
| O11—Cu2—O3—Cu3             | 179.03 (19)  | Cu3—O6—N4—C12                | 139.3 (3)    |
| N2—Cu2—O3—Cu3              | -2.40 (19)   | Cu1 <sup>ii</sup> —O6—N4—C12 | -97.1 (3)    |
| Na1—Cu2—O3—Cu3             | 163.94 (12)  | Cu5—O6—N4—Cu4                | -158.20 (14) |
| O7—Cu3—O3—N3               | 102.6 (4)    | Cu3—O6—N4—Cu4                | -38.5 (3)    |
| O2—Cu3—O3—N3               | -177.2 (3)   | Cu1 <sup>ii</sup> —O6—N4—Cu4 | 85.1 (2)     |
| O6—Cu3—O3—N3               | 16.6 (3)     | Cu1—O1—C1—N2                 | 8.7 (4)      |
| O4—Cu3—O3—N3               | -80.0 (3)    | Cu1—O1—C1—C2                 | -169.1 (3)   |
| O7—Cu3—O3—Cu2              | -74.2 (4)    | O2—N2—C1—O1                  | 2.5 (5)      |
| O2—Cu3—O3—Cu2              | 5.95 (18)    | Cu2—N2—C1—O1                 | -174.1 (3)   |
| O6—Cu3—O3—Cu2              | -160.22 (18) | O2—N2—C1—C2                  | -179.8 (3)   |
| O4—Cu3—O3—Cu2              | 103.25 (18)  | Cu2—N2—C1—C2                 | 3.6 (6)      |
| O23—P3—O10—Cu5             | 152.40 (19)  | O1—C1—C2—P1                  | -160.1 (3)   |
| O24—P3—O10—Cu5             | -84.3 (2)    | N2—C1—C2—P1                  | 22.1 (5)     |
| C9—P3—O10—Cu5              | 28.3 (3)     | O14—P1—C2—C1                 | -168.6 (3)   |
| Na3—P3—O10—Cu5             | -95.0 (2)    | O12—P1—C2—C1                 | -43.9 (4)    |
| O23—P3—O10—Na4             | -16.0 (3)    | O13—P1—C2—C1                 | 73.7 (3)     |
| O24—P3—O10—Na4             | 107.3 (2)    | P1—O13—C3A—C4A               | -179.9 (4)   |

|                 |              |                            |            |
|-----------------|--------------|----------------------------|------------|
| C9—P3—O10—Na4   | -140.1 (2)   | P1—O13—C3B—C4B             | -148.0 (6) |
| Na3—P3—O10—Na4  | 96.6 (2)     | O7—N1—C5—O8                | -2.7 (5)   |
| O23—P3—O10—Na3  | -112.61 (16) | Cu1—N1—C5—O8               | -175.3 (3) |
| O24—P3—O10—Na3  | 10.71 (15)   | O7—N1—C5—C18 <sup>i</sup>  | 178.5 (3)  |
| C9—P3—O10—Na3   | 123.25 (16)  | Cu1—N1—C5—C18 <sup>i</sup> | 5.8 (6)    |
| O14—P1—O12—Cu2  | 164.42 (18)  | Cu4—O8—C5—N1               | -9.6 (4)   |
| O13—P1—O12—Cu2  | -71.7 (2)    | Cu4—O8—C5—C18 <sup>i</sup> | 169.2 (3)  |
| C2—P1—O12—Cu2   | 41.2 (3)     | P2—O16—C6—C7               | 160.6 (4)  |
| O14—P1—O12—Na1  | -24.1 (3)    | Cu2—O11—C8—N3              | 0.3 (4)    |
| O13—P1—O12—Na1  | 99.8 (3)     | Na1—O11—C8—N3              | 147.8 (3)  |
| C2—P1—O12—Na1   | -147.3 (2)   | Cu2—O11—C8—C9              | -176.7 (3) |
| O11—Cu2—O12—P1  | 159.2 (2)    | Na1—O11—C8—C9              | -29.1 (6)  |
| N2—Cu2—O12—P1   | -19.5 (2)    | O3—N3—C8—O11               | 1.4 (5)    |
| Na1—Cu2—O12—P1  | 174.8 (3)    | Cu5—N3—C8—O11              | 174.7 (3)  |
| O11—Cu2—O12—Na1 | -15.67 (11)  | O3—N3—C8—C9                | 178.3 (3)  |
| N2—Cu2—O12—Na1  | 165.64 (12)  | Cu5—N3—C8—C9               | -8.3 (6)   |
| O14—P1—O13—C3B  | 136.6 (12)   | O11—C8—C9—P3               | -143.8 (3) |
| O12—P1—O13—C3B  | 11.8 (12)    | N3—C8—C9—P3                | 39.2 (5)   |
| C2—P1—O13—C3B   | -106.4 (12)  | O23—P3—C9—C8               | -177.1 (3) |
| O14—P1—O13—C3A  | 65.7 (4)     | O10—P3—C9—C8               | -47.8 (4)  |
| O12—P1—O13—C3A  | -59.1 (4)    | O24—P3—C9—C8               | 62.7 (3)   |
| C2—P1—O13—C3A   | -177.2 (4)   | Na3—P3—C9—C8               | 12.3 (4)   |
| O17—P2—O15—Cu4  | 176.00 (16)  | P3—O24—C10—C11             | -85.4 (5)  |
| O16—P2—O15—Cu4  | -61.0 (2)    | Na3—O24—C10—C11            | 142.9 (4)  |
| C13—P2—O15—Cu4  | 53.0 (2)     | O6—N4—C12—O9               | -3.1 (5)   |
| O17—P2—O16—C6   | -35.9 (4)    | Cu4—N4—C12—O9              | 174.1 (3)  |
| O15—P2—O16—C6   | -161.4 (4)   | O6—N4—C12—C13              | 175.4 (3)  |
| C13—P2—O16—C6   | 82.6 (4)     | Cu4—N4—C12—C13             | -7.4 (6)   |
| O21—P4—O20—Na1  | 111.9 (6)    | Cu5—O9—C12—N4              | -15.2 (4)  |

|                               |              |                                 |            |
|-------------------------------|--------------|---------------------------------|------------|
| O22—P4—O20—Na1                | -12.6 (7)    | Na4—O9—C12—N4                   | 160.9 (4)  |
| C18—P4—O20—Na1                | -123.1 (6)   | Cu5—O9—C12—C13                  | 166.2 (3)  |
| O20—P4—O21—Cu1 <sup>vii</sup> | -178.40 (18) | Na4—O9—C12—C13                  | -17.6 (8)  |
| O22—P4—O21—Cu1 <sup>vii</sup> | -52.0 (2)    | N4—C12—C13—P2                   | 18.5 (5)   |
| C18—P4—O21—Cu1 <sup>vii</sup> | 56.6 (2)     | O9—C12—C13—P2                   | -162.9 (3) |
| O20—P4—O22—C16                | 78.7 (4)     | O17—P2—C13—C12                  | -167.3 (3) |
| O21—P4—O22—C16                | -48.0 (4)    | O15—P2—C13—C12                  | -40.9 (4)  |
| C18—P4—O22—C16                | -164.1 (4)   | O16—P2—C13—C12                  | 73.1 (3)   |
| O23—P3—O24—C10                | -23.9 (4)    | Cu3—O4—C14—O5                   | 9.0 (7)    |
| O10—P3—O24—C10                | -150.9 (3)   | Cu3—O4—C14—C15                  | -173.4 (3) |
| C9—P3—O24—C10                 | 94.2 (3)     | Na3—O5—C14—O4                   | -171.5 (3) |
| Na3—P3—O24—C10                | -139.3 (4)   | Cu5—O5—C14—O4                   | 0.9 (7)    |
| O23—P3—O24—Na3                | 115.44 (15)  | Na3—O5—C14—C15                  | 10.9 (7)   |
| O10—P3—O24—Na3                | -11.60 (16)  | Cu5—O5—C14—C15                  | -176.7 (3) |
| C9—P3—O24—Na3                 | -126.49 (15) | P4—O22—C16—C17                  | 178.8 (4)  |
| Cu4—O7—N1—C5                  | 14.0 (4)     | O20—P4—C18—C5 <sup>vii</sup>    | -161.6 (3) |
| Cu3—O7—N1—C5                  | 153.1 (2)    | O21—P4—C18—C5 <sup>vii</sup>    | -35.2 (3)  |
| Cu4—O7—N1—Cu1                 | -171.64 (13) | O22—P4—C18—C5 <sup>vii</sup>    | 79.7 (3)   |
| Cu3—O7—N1—Cu1                 | -32.6 (3)    | Na2 <sup>iii</sup> —O29—C19—O30 | 164.4 (3)  |
| Cu1—O2—N2—C1                  | -12.9 (4)    | Na2 <sup>vi</sup> —O29—C19—O30  | 48.4 (5)   |
| Cu3—O2—N2—C1                  | -167.5 (2)   | Na4—O29—C19—O30                 | -66.0 (5)  |
| Cu1—O2—N2—Cu2                 | 164.40 (15)  | Na2 <sup>iii</sup> —O29—C19—C20 | -15.3 (5)  |
| Cu3—O2—N2—Cu2                 | 9.8 (3)      | Na2 <sup>vi</sup> —O29—C19—C20  | -131.3 (3) |
| Cu2—O3—N3—C8                  | -2.4 (4)     | Na4—O29—C19—C20                 | 114.3 (4)  |
| Cu3—O3—N3—C8                  | -179.5 (2)   |                                 |            |

Symmetry codes: (i)  $x, y-1, z$ ; (ii)  $-x, -y+1, -z+2$ ; (iii)  $-x, -y+2, -z+2$ ; (iv)  $x, y, z-1$ ; (v)  $-x, -y+2, -z+1$ ; (vi)  $x, y, z+1$ ; (vii)  $x, y+1, z$ .

**Table S5.** Selected bond distances (Å) and angles (°) for **1**.

|                          |             |
|--------------------------|-------------|
| Cu1—O2                   | 1.901 (3)   |
| Cu1—O21 <sup>i</sup>     | 1.926 (3)   |
| Cu1—O1                   | 1.955 (3)   |
| Cu1—N1                   | 1.971 (3)   |
| Cu1—O6 <sup>ii</sup>     | 2.439 (3)   |
| Cu2—O3                   | 1.864 (2)   |
| Cu2—O12                  | 1.900 (3)   |
| Cu2—O11                  | 1.947 (2)   |
| Cu2—N2                   | 1.970 (3)   |
| Cu2—Na1                  | 3.3549 (15) |
| Cu3—O3                   | 1.893 (2)   |
| Cu3—O7                   | 1.916 (3)   |
| Cu3—O2                   | 1.926 (2)   |
| Cu3—O6                   | 1.967 (2)   |
| Cu3—O4                   | 2.187 (3)   |
| Cu4—O7                   | 1.903 (2)   |
| Cu4—O15                  | 1.905 (2)   |
| Cu4—O8                   | 1.929 (3)   |
| Cu4—N4                   | 1.961 (3)   |
| Cu5—O9                   | 1.942 (2)   |
| Cu5—O6                   | 1.949 (2)   |
| Cu5—N3                   | 1.952 (3)   |
| Cu5—O10                  | 1.961 (3)   |
| Cu5—O5                   | 2.338 (3)   |
| O2—Cu1—O21 <sup>i</sup>  | 170.84 (13) |
| O2—Cu1—O1                | 80.75 (10)  |
| O21 <sup>i</sup> —Cu1—O1 | 95.23 (11)  |

|                                        |             |
|----------------------------------------|-------------|
| O2—Cu1—N1                              | 90.00 (11)  |
| O21 <sup>i</sup> —Cu1—N1               | 93.44 (12)  |
| O1—Cu1—N1                              | 170.17 (12) |
| O2—Cu1—O6 <sup>ii</sup>                | 98.46 (11)  |
| O21 <sup>i</sup> —Cu1—O6 <sup>ii</sup> | 89.92 (10)  |
| O1—Cu1—O6 <sup>ii</sup>                | 92.73 (10)  |
| N1—Cu1—O6 <sup>ii</sup>                | 91.91 (11)  |
| O3—Cu2—O12                             | 172.95 (11) |
| O3—Cu2—O11                             | 81.62 (10)  |
| O12—Cu2—O11                            | 91.38 (11)  |
| O3—Cu2—N2                              | 89.90 (11)  |
| O12—Cu2—N2                             | 97.11 (12)  |
| O11—Cu2—N2                             | 171.40 (11) |
| O3—Cu2—Na1                             | 120.58 (8)  |
| O12—Cu2—Na1                            | 52.43 (8)   |
| O11—Cu2—Na1                            | 41.56 (7)   |
| N2—Cu2—Na1                             | 146.87 (9)  |
| O3—Cu3—O7                              | 164.08 (12) |
| O3—Cu3—O2                              | 87.70 (11)  |
| O7—Cu3—O2                              | 89.54 (10)  |
| O3—Cu3—O6                              | 92.04 (10)  |
| O7—Cu3—O6                              | 86.94 (10)  |
| O2—Cu3—O6                              | 166.18 (11) |
| O3—Cu3—O4                              | 98.20 (13)  |
| O7—Cu3—O4                              | 97.71 (12)  |
| O2—Cu3—O4                              | 97.55 (12)  |
| O6—Cu3—O4                              | 96.17 (12)  |
| O7—Cu4—O15                             | 173.60 (11) |

|            |             |
|------------|-------------|
| O7—Cu4—O8  | 81.16 (10)  |
| O15—Cu4—O8 | 92.45 (11)  |
| O7—Cu4—N4  | 91.72 (11)  |
| O15—Cu4—N4 | 94.68 (11)  |
| O8—Cu4—N4  | 172.43 (11) |
| O9—Cu5—O6  | 81.70 (10)  |
| O9—Cu5—N3  | 174.55 (12) |
| O6—Cu5—N3  | 93.14 (11)  |
| O9—Cu5—O10 | 91.11 (11)  |
| O6—Cu5—O10 | 169.18 (11) |
| N3—Cu5—O10 | 94.24 (12)  |

Symmetry codes: (i)  $x, y-1, z$ ; (ii)  $-x, -y+1, -z+2$ .

**Table S6.** Hydrogen bonding details of **1** (Å, °).

| $D-H\cdots A$                                                                 | $D-H$ | $H\cdots A$ | $D\cdots A$ | $D-H\cdots A$ |
|-------------------------------------------------------------------------------|-------|-------------|-------------|---------------|
| O18—H18O $\cdots$ O8 <sup>ii</sup>                                            | 0.95  | 1.98        | 2.875 (4)   | 156           |
| O18—H18P $\cdots$ O23 <sup>iii</sup>                                          | 0.94  | 1.78        | 2.722 (4)   | 176           |
| O19—H19O $\cdots$ O14                                                         | 0.97  | 1.98        | 2.940 (4)   | 168           |
| O25—H25O $\cdots$ O31 <sup>viii</sup>                                         | 0.85  | 1.99        | 2.803 (4)   | 159           |
| O25—H25P $\cdots$ O30 <sup>ix</sup>                                           | 0.85  | 1.98        | 2.825 (6)   | 175           |
| O26—H26B $\cdots$ O14 <sup>vi</sup>                                           | 0.85  | 2.11        | 2.783 (4)   | 136           |
| O27—H27O $\cdots$ O17 <sup>x</sup>                                            | 0.91  | 1.98        | 2.849 (4)   | 159           |
| O27—H27P $\cdots$ O14 <sup>vi</sup>                                           | 0.91  | 1.89        | 2.781 (4)   | 166           |
| O28—H28P $\cdots$ O20 <sup>iii</sup>                                          | 0.82  | 2.29        | 3.038 (4)   | 151           |
| O28—H28P $\cdots$ O21 <sup>iii</sup>                                          | 0.82  | 2.54        | 3.202 (4)   | 138           |
| O31—H31O $\cdots$ O1                                                          | 0.95  | 1.89        | 2.806 (4)   | 162           |
| O31—H31P $\cdots$ O17 <sup>iv</sup>                                           | 0.81  | 1.94        | 2.744 (4)   | 167           |
| O32A <sup>a</sup> —H32A <sub>a</sub> $\cdots$ O30                             | 0.85  | 1.84        | 2.524 (11)  | 136           |
| O32A <sup>a</sup> —H32A <sub>a</sub> $\cdots$ O32A <sup>a</sup> <sub>ix</sub> | 0.85  | 2.19        | 2.68 (2)    | 116           |



|                                             |      |      |            |     |
|---------------------------------------------|------|------|------------|-----|
| O32Aa—H32B <sup>a···O30</sup> <sub>ix</sub> | 0.85 | 2.07 | 2.884 (11) | 161 |
| O32Bb—H32D <sup>b···O30</sup> <sub>ix</sub> | 0.85 | 2.19 | 2.684 (19) | 117 |
| O32Bb—H32C <sup>b···O30</sup>               | 0.85 | 1.81 | 2.63 (2)   | 164 |
| C2—H2A···O15ii                              | 0.99 | 2.54 | 3.341 (5)  | 138 |
| C13—H13A···O17x                             | 0.99 | 2.31 | 3.253 (5)  | 159 |
| C20—H20A···O23                              | 0.98 | 2.51 | 3.259 (5)  | 133 |

Symmetry codes: (ii)  $-x, -y+1, -z+2$ ; (iii)  $-x, -y+2, -z+2$ ; (iv)  $x, y, z-1$ ; (vi)  $x, y, z+1$ ; (viii)  $-x+1, -y+1, -z+2$ ; (ix)  $-x+1, -y+2, -z+3$ ; (x)  $-x, -y+1, -z+3$ .

**Table S7.** Crystal data and structure refinement parameters for the X-ray structures of **2**.

*Crystal data*

|                                                                                       |                                                                                      |
|---------------------------------------------------------------------------------------|--------------------------------------------------------------------------------------|
| <u>C<sub>14</sub>H<sub>16</sub>CuN<sub>3</sub>O<sub>5</sub>P·1.86(H<sub>2</sub>O)</u> |                                                                                      |
| $M_r = \underline{434.32}$                                                            | $D_x = \underline{1.723} \text{ Mg m}^{-3}$                                          |
| <u>Monoclinic, P2<sub>1</sub>/c</u>                                                   | Melting point: ? K                                                                   |
| Hall symbol: ?                                                                        | <u>Mo K<math>\alpha</math> radiation, <math>\lambda = 0.71073 \text{ \AA}</math></u> |
| $a = \underline{9.7384 (2)} \text{ \AA}$                                              | Cell parameters from <u>6923</u> reflections                                         |
| $b = \underline{12.0645 (2)} \text{ \AA}$                                             | $\theta = \underline{1.0-27.5}^\circ$                                                |
| $c = \underline{14.2492 (3)} \text{ \AA}$                                             | $\mu = \underline{1.44} \text{ mm}^{-1}$                                             |
| $\beta = \underline{90.418 (1)}^\circ$                                                | $T = \underline{100} \text{ K}$                                                      |
| $V = \underline{1674.08 (6)} \text{ \AA}^3$                                           | <u>Block, bluish green</u>                                                           |
| $Z = \underline{4}$                                                                   | <u>0.21 × 0.13 × 0.07 mm</u>                                                         |
| $F(000) = \underline{894.4}$                                                          |                                                                                      |

*Data collection*

|                                        |                                               |
|----------------------------------------|-----------------------------------------------|
| <u>Nonius Kappa CCD diffractometer</u> | <u>3845</u> independent reflections           |
|                                        | <u>3316</u> reflections with $I > 2\sigma(I)$ |
|                                        | $R_{\text{int}} = \underline{0.043}$          |

|                                                                          |                                                                                        |
|--------------------------------------------------------------------------|----------------------------------------------------------------------------------------|
| Detector resolution: <u>9</u> pixels mm <sup>-1</sup>                    | $\theta_{\max} = \underline{27.5}^{\circ}$ , $\theta_{\min} = \underline{2.2}^{\circ}$ |
| $\varphi$ scans and $\omega$ scans with $\kappa$ offset                  | $h = \underline{-12}$ $\underline{12}$                                                 |
| Absorption correction: <u>multi-scan SADABS v.2.10 (Sheldrick, 2003)</u> | $k = \underline{-15}$ $\underline{15}$                                                 |
| $T_{\min} = \underline{0.747}$ , $T_{\max} = \underline{0.903}$          | $l = \underline{-18}$ $\underline{18}$                                                 |
| <u>36861</u> measured reflections                                        |                                                                                        |

### Refinement

|                                             |                                                                                     |
|---------------------------------------------|-------------------------------------------------------------------------------------|
| Refinement on $F^2$                         |                                                                                     |
| Least-squares matrix: <u>full</u>           | Hydrogen site location: <u>mixed</u>                                                |
| $R[F^2 > 2\sigma(F^2)] = \underline{0.026}$ | <u>H atoms treated by a mixture of independent and constrained refinement</u>       |
| $wR(F^2) = \underline{0.065}$               | $w = 1/[\sigma^2(F_o^2) + (0.0238P)^2 + 1.8596P]$<br>where $P = (F_o^2 + 2F_c^2)/3$ |
| $S = \underline{1.06}$                      | $(\Delta/\sigma)_{\max} = \underline{0.001}$                                        |
| <u>3845</u> reflections                     | $\Delta\rho_{\max} = \underline{0.39}$ e Å <sup>-3</sup>                            |
| <u>251</u> parameters                       | $\Delta\rho_{\min} = \underline{-0.37}$ e Å <sup>-3</sup>                           |
| <u>0</u> restraints                         | Extinction correction: <u>none</u>                                                  |

**Table S8.** Bond lengths (Å) and angles (°) for **2**.

|                      |             |        |           |
|----------------------|-------------|--------|-----------|
| Cu1—O3               | 1.9040 (13) | C4—C5  | 1.388 (3) |
| Cu1—O2               | 1.9627 (13) | C4—H4  | 0.9500    |
| Cu1—N2               | 1.9813 (15) | C5—C6  | 1.482 (3) |
| Cu1—N1               | 1.9891 (15) | C6—C7  | 1.388 (3) |
| Cu1—O1               | 2.4159 (13) | C7—C8  | 1.386 (3) |
| Cu1—Cu1 <sup>i</sup> | 6.9971 (2)  | C7—H7  | 0.9500    |
| P1—O4                | 1.5015 (13) | C8—C9  | 1.387 (3) |
| P1—O1 <sup>ii</sup>  | 1.5017 (13) | C8—H8  | 0.9500    |
| P1—O5                | 1.5983 (13) | C9—C10 | 1.389 (3) |

|           |             |           |             |
|-----------|-------------|-----------|-------------|
| P1—C12    | 1.8252 (19) | C9—H9     | 0.9500      |
| O2—C11    | 1.291 (2)   | C10—H10   | 0.9500      |
| O3—N3     | 1.3728 (19) | C11—C12   | 1.495 (2)   |
| O5—C13B   | 1.455 (2)   | C12—H12A  | 0.9900      |
| O5—C13A   | 1.455 (2)   | C12—H12B  | 0.9900      |
| O7—H7O    | 0.8202      | C13A—C14A | 1.490 (3)   |
| O7—H7P    | 0.8527      | C13A—H13A | 0.9900      |
| N1—C1     | 1.342 (2)   | C13A—H13B | 0.9900      |
| N1—C5     | 1.356 (2)   | C14A—H14A | 0.9800      |
| N2—C10    | 1.338 (2)   | C14A—H14B | 0.9800      |
| N2—C6     | 1.353 (2)   | C14A—H14C | 0.9800      |
| N3—C11    | 1.298 (2)   | O6—H6O    | 0.9915      |
| N3—H3N    | 0.87 (2)    | O6—H6P    | 0.9504      |
| C1—C2     | 1.385 (3)   | C13B—C14B | 1.580 (17)  |
| C1—H1     | 0.9500      | C13B—H13C | 0.9900      |
| C2—C3     | 1.385 (3)   | C13B—H13D | 0.9900      |
| C2—H2     | 0.9500      | C14B—H14D | 0.9800      |
| C3—C4     | 1.387 (3)   | C14B—H14E | 0.9800      |
| C3—H3     | 0.9500      | C14B—H14F | 0.9800      |
| O3—Cu1—O2 | 84.88 (5)   | C4—C5—C6  | 123.67 (17) |
| O3—Cu1—N2 | 92.87 (6)   | N2—C6—C7  | 121.41 (17) |
| O2—Cu1—N2 | 171.77 (6)  | N2—C6—C5  | 114.45 (16) |
| O3—Cu1—N1 | 163.35 (6)  | C7—C6—C5  | 124.13 (16) |
| O2—Cu1—N1 | 97.82 (6)   | C8—C7—C6  | 118.72 (17) |
| N2—Cu1—N1 | 82.12 (6)   | C8—C7—H7  | 120.6       |
| O3—Cu1—O1 | 105.02 (5)  | C6—C7—H7  | 120.6       |
| O2—Cu1—O1 | 99.46 (5)   | C7—C8—C9  | 119.70 (18) |
| N2—Cu1—O1 | 88.77 (5)   | C7—C8—H8  | 120.1       |

|                          |             |                |             |
|--------------------------|-------------|----------------|-------------|
| N1—Cu1—O1                | 90.81 (5)   | C9—C8—H8       | 120.1       |
| O3—Cu1—Cu1 <sup>i</sup>  | 83.93 (4)   | C8—C9—C10      | 118.63 (18) |
| O2—Cu1—Cu1 <sup>i</sup>  | 73.62 (4)   | C8—C9—H9       | 120.7       |
| N2—Cu1—Cu1 <sup>i</sup>  | 114.08 (4)  | C10—C9—H9      | 120.7       |
| N1—Cu1—Cu1 <sup>i</sup>  | 112.63 (4)  | N2—C10—C9      | 121.78 (17) |
| O1—Cu1—Cu1 <sup>i</sup>  | 32.10 (3)   | N2—C10—H10     | 119.1       |
| O4—P1—O1 <sup>ii</sup>   | 118.93 (7)  | C9—C10—H10     | 119.1       |
| O4—P1—O5                 | 110.21 (7)  | O2—C11—N3      | 119.58 (16) |
| O1 <sup>ii</sup> —P1—O5  | 106.07 (7)  | O2—C11—C12     | 122.48 (16) |
| O4—P1—C12                | 105.62 (8)  | N3—C11—C12     | 117.90 (16) |
| O1 <sup>ii</sup> —P1—C12 | 110.02 (8)  | C11—C12—P1     | 117.54 (13) |
| O5—P1—C12                | 105.24 (8)  | C11—C12—H12A   | 107.9       |
| P1 <sup>i</sup> —O1—Cu1  | 125.77 (7)  | P1—C12—H12A    | 107.9       |
| C11—O2—Cu1               | 108.63 (11) | C11—C12—H12B   | 107.9       |
| N3—O3—Cu1                | 107.53 (10) | P1—C12—H12B    | 107.9       |
| C13B—O5—P1               | 118.92 (11) | H12A—C12—H12B  | 107.2       |
| C13A—O5—P1               | 118.92 (11) | O5—C13A—C14A   | 109.23 (17) |
| H7O—O7—H7P               | 106.9       | O5—C13A—H13A   | 109.8       |
| C1—N1—C5                 | 119.24 (16) | C14A—C13A—H13A | 109.8       |
| C1—N1—Cu1                | 126.58 (13) | O5—C13A—H13B   | 109.8       |
| C5—N1—Cu1                | 114.13 (12) | C14A—C13A—H13B | 109.8       |
| C10—N2—C6                | 119.73 (16) | H13A—C13A—H13B | 108.3       |
| C10—N2—Cu1               | 125.44 (12) | C13A—C14A—H14A | 109.5       |
| C6—N2—Cu1                | 114.54 (12) | C13A—C14A—H14B | 109.5       |
| C11—N3—O3                | 119.35 (15) | H14A—C14A—H14B | 109.5       |
| C11—N3—H3N               | 123.5 (16)  | C13A—C14A—H14C | 109.5       |
| O3—N3—H3N                | 117.2 (16)  | H14A—C14A—H14C | 109.5       |
| N1—C1—C2                 | 121.69 (17) | H14B—C14A—H14C | 109.5       |

|                              |              |                |              |
|------------------------------|--------------|----------------|--------------|
| N1—C1—H1                     | 119.2        | H6O—O6—H6P     | 103.0        |
| C2—C1—H1                     | 119.2        | O5—C13B—C14B   | 103.1 (7)    |
| C1—C2—C3                     | 119.36 (18)  | O5—C13B—H13C   | 111.1        |
| C1—C2—H2                     | 120.3        | C14B—C13B—H13C | 111.1        |
| C3—C2—H2                     | 120.3        | O5—C13B—H13D   | 111.1        |
| C2—C3—C4                     | 119.21 (17)  | C14B—C13B—H13D | 111.1        |
| C2—C3—H3                     | 120.4        | H13C—C13B—H13D | 109.1        |
| C4—C3—H3                     | 120.4        | C13B—C14B—H14D | 109.5        |
| C3—C4—C5                     | 118.75 (17)  | C13B—C14B—H14E | 109.5        |
| C3—C4—H4                     | 120.6        | H14D—C14B—H14E | 109.5        |
| C5—C4—H4                     | 120.6        | C13B—C14B—H14F | 109.5        |
| N1—C5—C4                     | 121.73 (17)  | H14D—C14B—H14F | 109.5        |
| N1—C5—C6                     | 114.60 (16)  | H14E—C14B—H14F | 109.5        |
| O4—P1—O5—C13B                | -38.13 (15)  | N1—C5—C6—N2    | -4.1 (2)     |
| O1 <sup>ii</sup> —P1—O5—C13B | -168.11 (13) | C4—C5—C6—N2    | 176.08 (16)  |
| C12—P1—O5—C13B               | 75.30 (14)   | N1—C5—C6—C7    | 175.05 (17)  |
| O4—P1—O5—C13A                | -38.13 (15)  | C4—C5—C6—C7    | -4.8 (3)     |
| O1 <sup>ii</sup> —P1—O5—C13A | -168.11 (13) | N2—C6—C7—C8    | 2.0 (3)      |
| C12—P1—O5—C13A               | 75.30 (14)   | C5—C6—C7—C8    | -177.10 (17) |
| Cu1—O3—N3—C11                | 1.55 (18)    | C6—C7—C8—C9    | -2.0 (3)     |
| C5—N1—C1—C2                  | 0.2 (3)      | C7—C8—C9—C10   | 0.6 (3)      |
| Cu1—N1—C1—C2                 | 177.53 (13)  | C6—N2—C10—C9   | -0.9 (3)     |
| N1—C1—C2—C3                  | 0.5 (3)      | Cu1—N2—C10—C9  | 172.60 (14)  |
| C1—C2—C3—C4                  | -0.6 (3)     | C8—C9—C10—N2   | 0.9 (3)      |
| C2—C3—C4—C5                  | 0.0 (3)      | Cu1—O2—C11—N3  | -0.7 (2)     |
| C1—N1—C5—C4                  | -0.7 (3)     | Cu1—O2—C11—C12 | -178.21 (13) |
| Cu1—N1—C5—C4                 | -178.40 (13) | O3—N3—C11—O2   | -0.6 (2)     |
| C1—N1—C5—C6                  | 179.44 (15)  | O3—N3—C11—C12  | 177.03 (14)  |

|                                                                      |              |                              |              |
|----------------------------------------------------------------------|--------------|------------------------------|--------------|
| Cu1—N1—C5—C6                                                         | 1.77 (19)    | O2—C11—C12—P1                | -79.3 (2)    |
| C3—C4—C5—N1                                                          | 0.6 (3)      | N3—C11—C12—P1                | 103.16 (17)  |
| C3—C4—C5—C6                                                          | -179.56 (17) | O4—P1—C12—C11                | -167.45 (13) |
| C10—N2—C6—C7                                                         | -0.5 (3)     | O1 <sup>ii</sup> —P1—C12—C11 | -37.93 (16)  |
| Cu1—N2—C6—C7                                                         | -174.75 (14) | O5—P1—C12—C11                | 75.93 (15)   |
| C10—N2—C6—C5                                                         | 178.64 (16)  | P1—O5—C13A—C14A              | -174.01 (15) |
| Cu1—N2—C6—C5                                                         | 4.42 (19)    | P1—O5—C13B—C14B              | -134.1 (9)   |
| Symmetry codes: (i) $-x, y-1/2, -z+1/2$ ; (ii) $-x, y+1/2, -z+1/2$ . |              |                              |              |

**Table S9.** Selected bond distances (Å) and angles (°) for **2**.

|           |             |
|-----------|-------------|
| Cu1—O3    | 1.9040 (13) |
| Cu1—O2    | 1.9627 (13) |
| Cu1—N2    | 1.9813 (15) |
| Cu1—N1    | 1.9891 (15) |
| Cu1—O1    | 2.4159 (13) |
| O3—Cu1—O2 | 84.88 (5)   |
| O3—Cu1—N2 | 92.87 (6)   |
| O2—Cu1—N2 | 171.77 (6)  |
| O3—Cu1—N1 | 163.35 (6)  |
| O2—Cu1—N1 | 97.82 (6)   |
| N2—Cu1—N1 | 82.12 (6)   |
| O3—Cu1—O1 | 105.02 (5)  |
| O2—Cu1—O1 | 99.46 (5)   |
| N2—Cu1—O1 | 88.77 (5)   |
| N1—Cu1—O1 | 90.81 (5)   |

**Table S10.** Hydrogen bonding details of **2**(Å, °).

| <i>D</i> —H··· <i>A</i>    | <i>D</i> —H | H··· <i>A</i> | <i>D</i> ··· <i>A</i> | <i>D</i> —H··· <i>A</i> |
|----------------------------|-------------|---------------|-----------------------|-------------------------|
| O6—H6O···O2                | 0.99        | 1.96          | 2.901 (2)             | 159                     |
| O6—H6P···O7                | 0.95        | 1.79          | 2.729 (2)             | 168                     |
| O7—H7O···O1                | 0.82        | 2.00          | 2.8113 (19)           | 169                     |
| O7—H7P···O4 <sup>iii</sup> | 0.85        | 1.98          | 2.8178 (19)           | 168                     |
| N3—H3N···O4 <sup>iv</sup>  | 0.87 (2)    | 1.91 (3)      | 2.781 (2)             | 172 (2)                 |

Symmetry codes: (iii)  $x, -y+1/2, z+1/2$ ; (iv)  $-x, -y, -z$ .
